# Supplementary material for: Pathogenesis and Clinical Management of Mesenteric Fibrosis in Small Intestinal Neuroendocine Neoplasms: A Systematic Review
Source: PubMed Central journal article supplement (PMC7357094; doi:10.3390/jcm9061777), 2020-06-08
Supplement: jcm-09-01777-s001.pdf [file jcm-09-01777-s001.pdf]

## Embase 200122

|                              | Search terms.                                                                                                                                                                                                                                                                                                                                                                                                                                        | Number of studies |
|------------------------------|------------------------------------------------------------------------------------------------------------------------------------------------------------------------------------------------------------------------------------------------------------------------------------------------------------------------------------------------------------------------------------------------------------------------------------------------------|-------------------|
| <b>Neuroendocrine tumors</b> |                                                                                                                                                                                                                                                                                                                                                                                                                                                      |                   |
| 1.                           | (neuroendocrine NEAR/3 tumo*r*):ti,ab,kw OR (neuroendocrine NEAR/3 cancer*):ti,ab,kw OR (neuroendocrine NEAR/3 neoplas*):ti,ab,kw OR (neuroendocrine NEAR/3 carcinom*):ti,ab,kw OR (neuroendocrine NEAR/3 malignanc*):ti,ab,kw OR (adenoma* NEAR/1 chromophobe):ti,ab,kw OR (adenoma* NEAR/1 basophil):ti,ab,kw OR (adenoma* NEAR/1 acidophil):ti,ab,kw                                                                                              | 36,732            |
| 2.                           | 'neuroendocrine tumor'/de OR 'gastroenteropancreatic neuroendocrine tumor'/exp OR 'multiple endocrine neoplasia type 1'/de OR 'chromophobe adenoma'/de OR 'neuroendocrine carcinoma'/exp OR 'vipoma'/de OR 'somatostatinoma'/de OR 'multiple endocrine neoplasia type 1':ti,ab,kw OR 'men 1':ti,ab,kw OR vipoma*:ti,ab,kw OR somatostatinoma*:ti,ab,kw OR apudoma*:ti,ab,kw                                                                          | 54,095            |
| 3.                           | 'carcinoid'/de OR 'carcinoid syndrome'/de OR 'gastrointestinal carcinoid'/exp OR carcinoid*:ti,ab,kw                                                                                                                                                                                                                                                                                                                                                 | 26,212            |
| 4.                           | 1. OR 2. OR 3.                                                                                                                                                                                                                                                                                                                                                                                                                                       | 82,367            |
| <b>Fibrosis</b>              |                                                                                                                                                                                                                                                                                                                                                                                                                                                      |                   |
| 5.                           | 'fibrosis'/de OR 'intestinal fibrosis'/de OR 'peritoneal fibrosis'/de OR 'retroperitoneal fibrosis'/de OR 'tissue adhesion'/de OR 'sclerosis'/de OR 'desmoplasia'/de OR 'fibroplasia'/de OR fibrosis:ti,ab,kw OR fibroses:ti,ab,kw OR fibrotic:ti,ab,kw OR fibroplasia:ti,ab,kw OR sclerosis:ti,ab,kw OR scleroses:ti,ab,kw OR sclerotic:ti,ab,kw OR desmoplasia:ti,ab,kw OR 'desmoplastic reaction*':ti,ab,kw OR (tissue NEAR/1 adhesion*):ti,ab,kw | 530,263           |
| <b>Combined sets</b>         |                                                                                                                                                                                                                                                                                                                                                                                                                                                      |                   |
| 6.                           | 4. AND 5.                                                                                                                                                                                                                                                                                                                                                                                                                                            | 1,272             |
| <b>After deduplication</b>   |                                                                                                                                                                                                                                                                                                                                                                                                                                                      | 779               |

## Web of Science 200122

|                              | Search terms.                                                                                                                                                                                                                                                                                                                                                                                                                                                 | Number of studies |
|------------------------------|---------------------------------------------------------------------------------------------------------------------------------------------------------------------------------------------------------------------------------------------------------------------------------------------------------------------------------------------------------------------------------------------------------------------------------------------------------------|-------------------|
| <b>Neuroendocrine tumors</b> |                                                                                                                                                                                                                                                                                                                                                                                                                                                               |                   |
| 1.                           | TOPIC: (neuroendocrine NEAR/3 tumo*r*) OR TOPIC: (neuroendocrine NEAR/3 cancer*) OR TOPIC: (neuroendocrine NEAR/3 neoplas*) OR TOPIC: (neuroendocrine NEAR/3 carcinom*) OR TOPIC: (neuroendocrine NEAR/3 malignanc*) OR TOPIC: (adenoma* NEAR/1 acidophil) OR TOPIC: (adenoma* NEAR/1 basophil) OR TOPIC: (adenoma* NEAR/1 chromophobe) OR TOPIC=( "multiple endocrine neoplasia type 1" OR "MEN 1" OR vipoma* OR somatostatinoma* OR apudoma* OR carcinoid*) | 42,882            |
| <b>Fibrosis</b>              |                                                                                                                                                                                                                                                                                                                                                                                                                                                               |                   |
| 2.                           | TOPIC=(fibrosis OR fibroses OR fibrotic OR fibroplasia OR sclerosis OR scleroses OR sclerotic OR desmoplasia OR "desmoplastic reaction*") OR TOPIC: (tissue NEAR/1 adhesion*)                                                                                                                                                                                                                                                                                 | 454,040           |
| <b>Combined sets</b>         |                                                                                                                                                                                                                                                                                                                                                                                                                                                               |                   |
| 3.                           | 1. AND 2.                                                                                                                                                                                                                                                                                                                                                                                                                                                     | 622               |
| <b>After deduplication</b>   |                                                                                                                                                                                                                                                                                                                                                                                                                                                               | 209               |

## Medline through Ovid 200124

|                              | Search terms.                                                                                                                                                                                                                                                      | Number of studies |
|------------------------------|--------------------------------------------------------------------------------------------------------------------------------------------------------------------------------------------------------------------------------------------------------------------|-------------------|
| <b>Neuroendocrine tumors</b> |                                                                                                                                                                                                                                                                    |                   |
| 1.                           | (neuroendocrine adj4 (tumo?r* or neoplas* or cancer* or carcinom* or malignanc*)).ab,kf,ti.                                                                                                                                                                        | 21,066            |
| 2.                           | neuroendocrine tumors/ or adenoma, acidophil/ or adenoma, basophil/ or adenoma, chromophobe/ or apudoma/ or carcinoid tumor/ or malignant carcinoid syndrome/ or carcinoma, neuroendocrine/ or somatostatinoma/ or vipoma/ or Multiple Endocrine Neoplasia Type 1/ | 27,571            |
| 3.                           | (carcinoid* or somatostatinoma* or vipoma* or apudoma* or (adenoma* adj2 chromophobe) or (adenoma* adj2 basophil*) or (adenoma* adj2 acidophil*) or "Multiple Endocrine Neoplasia Type 1" or "MEN 1").ab,kf,ti.                                                    | 20,054            |
| 4.                           | 1. OR 2. OR 3.                                                                                                                                                                                                                                                     | 43,080            |
| <b>Fibrosis</b>              |                                                                                                                                                                                                                                                                    |                   |
| 5.                           | (fibrosis or fibroses or fibroplasia or desmoplasia or sclerosis or scleroses or fibrotic or sclerotic or "desmoplastic reaction" or "desmoplastic reactions" or (tissue adj2 adhesion*)).ab,kf,ti.                                                                | 333,020           |
| 6.                           | fibrosis/ or tissue adhesions/ or peritoneal fibrosis/ or retroperitoneal fibrosis/                                                                                                                                                                                | 44,050            |
| 7.                           | exp Sclerosis/                                                                                                                                                                                                                                                     | 8,712             |
| 8.                           | 5. OR 6. OR 7.                                                                                                                                                                                                                                                     | 355,024           |
| <b>Combined sets</b>         |                                                                                                                                                                                                                                                                    |                   |
| 9.                           | 4. AND 8.                                                                                                                                                                                                                                                          | 554               |
| <b>After deduplication</b>   |                                                                                                                                                                                                                                                                    | 549               |

#### Scopus 200123

|                              | Search terms.                                                                                                                                                                                                                                                                                                                 | Number of studies |
|------------------------------|-------------------------------------------------------------------------------------------------------------------------------------------------------------------------------------------------------------------------------------------------------------------------------------------------------------------------------|-------------------|
| <b>Neuroendocrine tumors</b> |                                                                                                                                                                                                                                                                                                                               |                   |
| 1.                           | (TITLE-ABS-KEY (( neuroendocrine W/3 (tumo*r* OR neoplas* OR cancer* OR carcinom* OR malignanc*)))) OR (TITLE-ABS-KEY (( carcinoid* OR somatostatinoma* OR vipoma* OR apudoma* OR (adenoma* W/1 chromophobe) OR (adenoma* W/1 basophil*) OR (adenoma* W/1 acidophil*) OR "Multiple Endocrine Neoplasia Type 1" OR "MEN 1" ))) | 54,719            |
| <b>Fibrosis</b>              |                                                                                                                                                                                                                                                                                                                               |                   |
| 2.                           | TITLE-ABS-KEY (( fibrosis OR fibroses OR fibroplasia OR desmoplasia OR sclerosis OR scleroses OR fibrotic OR sclerotic OR "desmoplastic reaction" OR "desmoplastic reactions" OR (tissue W/1 adhesion* )))                                                                                                                    | 505,999           |
| <b>Combined sets</b>         |                                                                                                                                                                                                                                                                                                                               |                   |
| 3.                           | 1. AND 2.                                                                                                                                                                                                                                                                                                                     | 1,097             |
| <b>After deduplication</b>   |                                                                                                                                                                                                                                                                                                                               | 355               |

#### Cochrane 200124

|                              | Search terms.                                                                                                                                                                                                          | Number of studies |
|------------------------------|------------------------------------------------------------------------------------------------------------------------------------------------------------------------------------------------------------------------|-------------------|
| <b>Neuroendocrine tumors</b> |                                                                                                                                                                                                                        |                   |
| 1.                           | ((neuroendocrine NEAR/3 (tumo?r* or neoplas* or cancer* or carcinom* or malignanc*)):ti,ab,kw                                                                                                                          | 1036              |
| 2.                           | ((carcinoid* or somatostatinoma* or vipoma* or apudoma* or (adenoma* NEAR/1 chromophobe) or (adenoma* NEAR/1 basophil*) or (adenoma* NEAR/1 acidophil*) or "Multiple Endocrine Neoplasia Type 1" or "MEN 1")):ti,ab,kw | 694               |

|                            |                                                                                                                                                                                                       |       |
|----------------------------|-------------------------------------------------------------------------------------------------------------------------------------------------------------------------------------------------------|-------|
| 3.                         | MeSH descriptor: [Neuroendocrine Tumors] this term only                                                                                                                                               | 145   |
| 4.                         | MeSH descriptor: [Adenoma, Acidophil] this term only                                                                                                                                                  | 0     |
| 5.                         | MeSH descriptor: [Adenoma, Basophil] explode all trees                                                                                                                                                | 0     |
| 6.                         | MeSH descriptor: [Adenoma, Chromophobe] this term only                                                                                                                                                | 1     |
| 7.                         | MeSH descriptor: [Apudoma] this term only                                                                                                                                                             | 0     |
| 8.                         | MeSH descriptor: [Carcinoid Tumor] this term only                                                                                                                                                     | 72    |
| 9.                         | MeSH descriptor: [Malignant Carcinoid Syndrome] this term only                                                                                                                                        | 34    |
| 10.                        | MeSH descriptor: [Carcinoma, Neuroendocrine] this term only                                                                                                                                           | 38    |
| 11.                        | MeSH descriptor: [Somatostatinoma] this term only                                                                                                                                                     | 3     |
| 12.                        | MeSH descriptor: [Vipoma] this term only                                                                                                                                                              | 2     |
| 13.                        | MeSH descriptor: [Multiple Endocrine Neoplasia Type 1] this term only                                                                                                                                 | 9     |
| 14.                        | 1. OR 2. OR 3. OR 4. OR 5. OR 6. OR 7. OR 8. OR 9. OR 10. OR 11. OR 12. OR 13.                                                                                                                        | 1521  |
| <b>Fibrosis</b>            |                                                                                                                                                                                                       |       |
| 15.                        | ((fibrosis or fibroses or fibroplasia or desmoplasia or sclerosis or scleroses or fibrotic or sclerotic or "desmoplastic reaction" or "desmoplastic reactions" or (tissue NEAR/1 adhesion*)):ti,ab,kw | 27345 |
| 16.                        | MeSH descriptor: [Fibrosis] this term only                                                                                                                                                            | 1254  |
| 17.                        | MeSH descriptor: [Tissue Adhesions] this term only                                                                                                                                                    | 456   |
| 18.                        | MeSH descriptor: [Peritoneal Fibrosis] this term only                                                                                                                                                 | 3     |
| 19.                        | MeSH descriptor: [Retroperitoneal Fibrosis] this term only                                                                                                                                            | 6     |
| 20.                        | MeSH descriptor: [Sclerosis] this term only                                                                                                                                                           | 969   |
| 21.                        | 15. OR 16. OR 17. OR 18. OR 19. OR 20.                                                                                                                                                                | 27345 |
| <b>Combined sets</b>       |                                                                                                                                                                                                       |       |
| 22.                        | 14. AND 21.                                                                                                                                                                                           | 17    |
| <b>After deduplication</b> |                                                                                                                                                                                                       | 4     |
